# Supplementary material
Source: PubMed Central journal article supplement (PMC1885357)

## Electronic Supplementary Materials 1: Thin-film equations

Because we used a perpendicular initial angle of incidence in our colour measurements, only the formulae for the p-component of polarization are presented. Following Jellison (1993), we treated each interface as a matrix of the form

$$I_j = \begin{bmatrix} 1 & r_j \\ r_j & 1 \end{bmatrix} \quad [1]$$

where  $r_j = (\tilde{n}_j \cos \phi_{j-1} - \tilde{n}_{j-1} \cos \phi_j) / (\tilde{n}_j \cos \phi_{j-1} + \tilde{n}_{j-1} \cos \phi_j)$ .

$\tilde{n}_j$  and  $\tilde{n}_{j-1}$  are the complex refractive indices ( $(\tilde{n} = n - ki)$ , where  $n$  = real refractive index and  $k$  = extinction coefficient) of the layer under consideration and the layer above it, respectively.  $\phi_j$  and  $\phi_{j-1}$  are the complex angles of incidence, calculated using Snell's law:  $\tilde{n}_0 \sin \phi_0 = \tilde{n}_j \sin \phi_j$ .

The transfer matrix incorporated the thickness of the  $j$ th layer:

$$L_j = \begin{bmatrix} \exp(ib_j) & 0 \\ 0 & \exp(-ib_j) \end{bmatrix} \quad [2]$$

$b_j = (2\pi d_j \tilde{n}_j \cos \phi_j) / \lambda$ , where  $d_j$  is the thickness of the layer, and  $\lambda$  is the wavelength of light.

The total scattering matrix is then given by

$$S = \left( \prod_1^N I_j L_j \right) I_{N+1}, \quad [3]$$

where  $N$  is the layer number. [4]

The amplitude reflectivity ( $r$ ) is  $r = S_{21} / S_{11}$ .

The final reflectance ( $R$ ) is calculated as  $R = rr^*$ . [5]

## **Electronic Supplementary Materials 2: Example of nanostructural measurements**

Transmission electron micrograph of an iridescent feather barbule illustrating measured nanostructural variables. C = Cortex, M = Melanin granules.

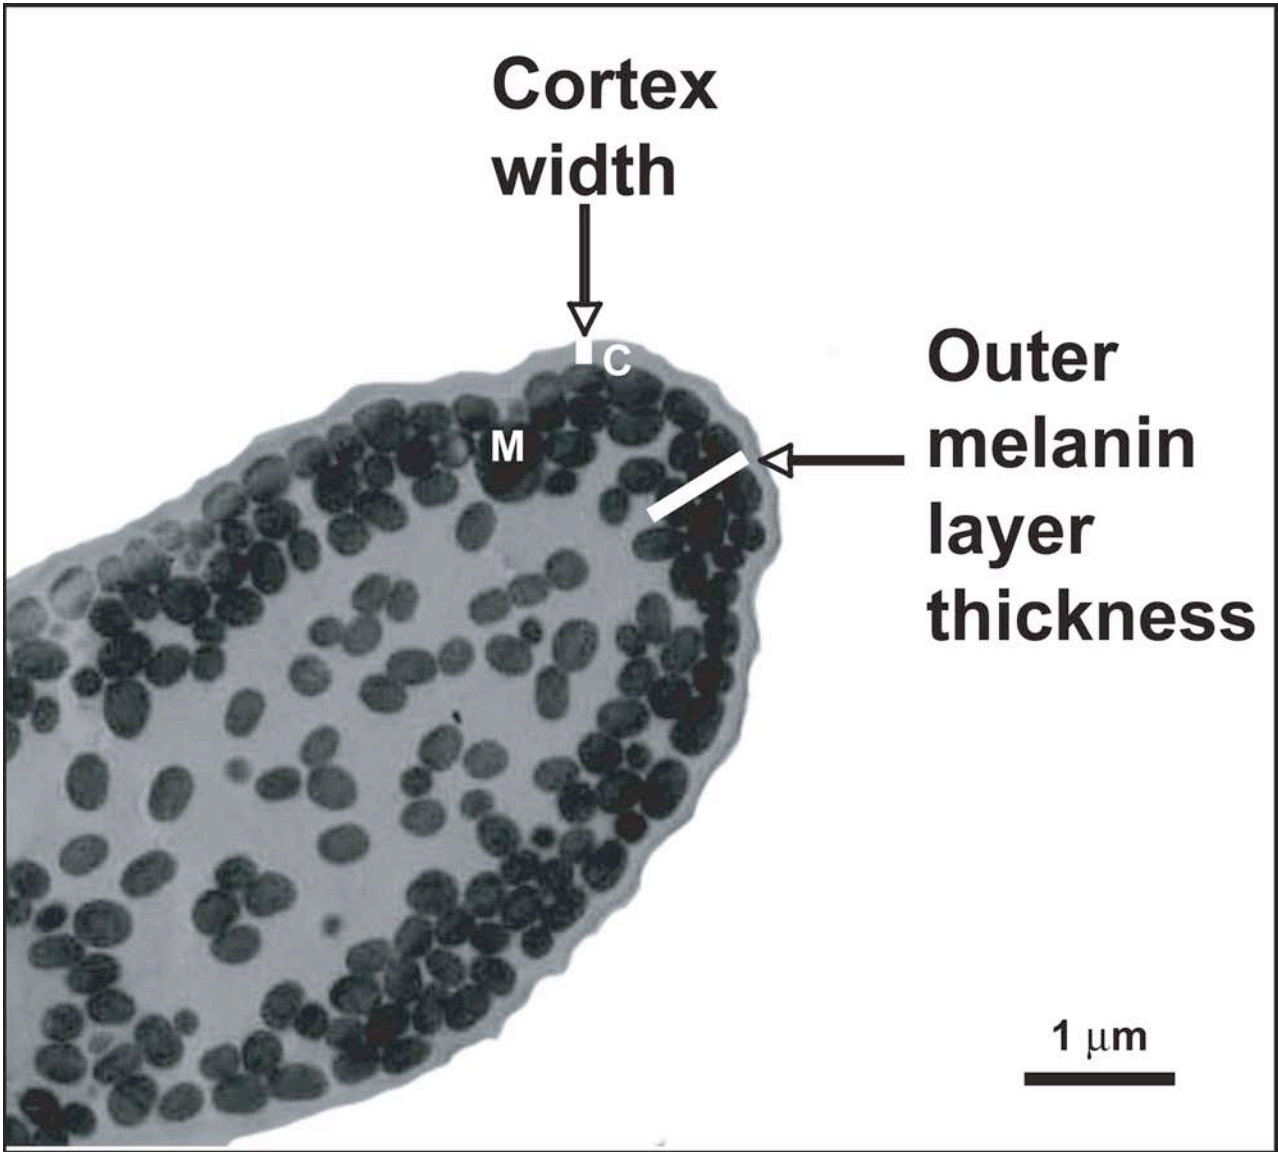

**Electronic Supplementary Materials 3:** Examples of the microanatomy of feather barbules of the species used in this study. All images are transmission electron micrographs, and scale bars in each case are 500 nm.

Bronzed  
cowbird

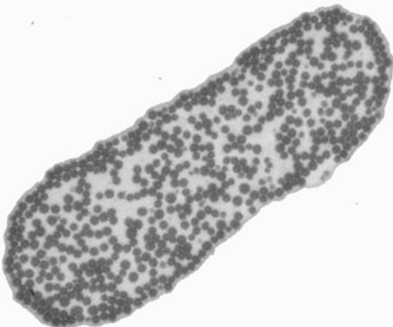

Great-tailed  
grackle

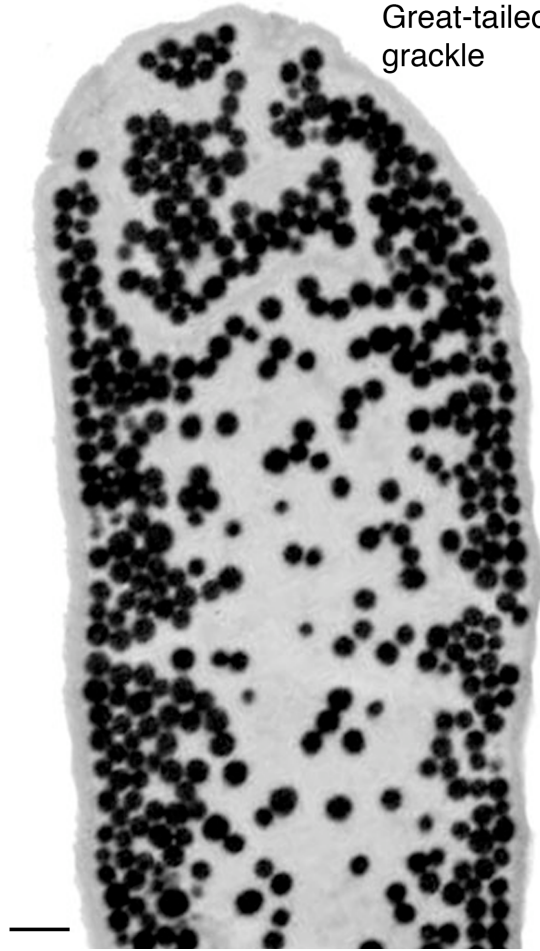

Red-winged blackbird

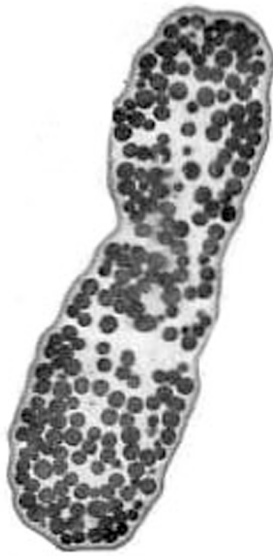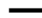

Brown-headed  
cowbird

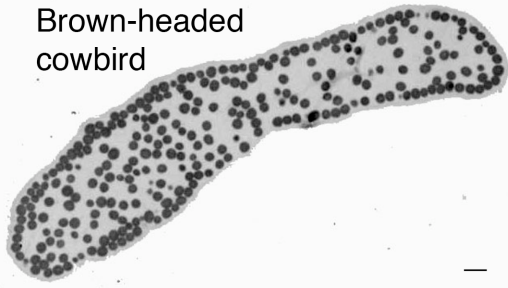



Giant cowbird

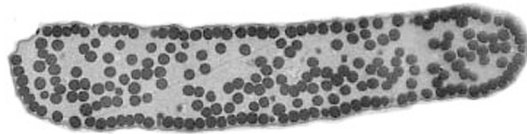

Screaming  
cowbird

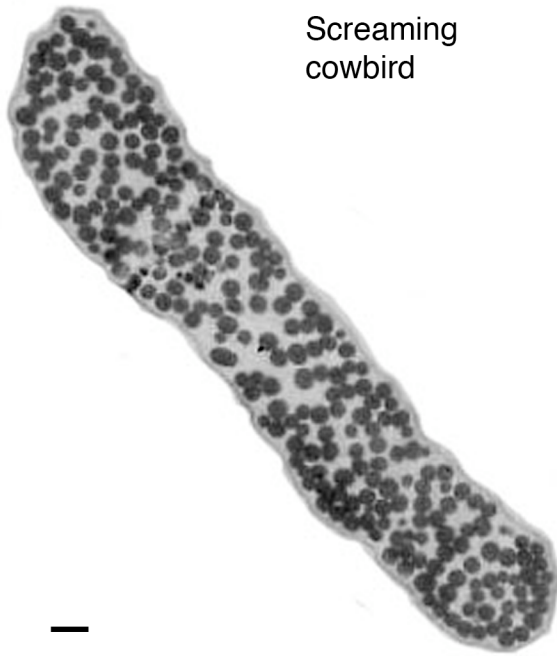

Scrub blackbird

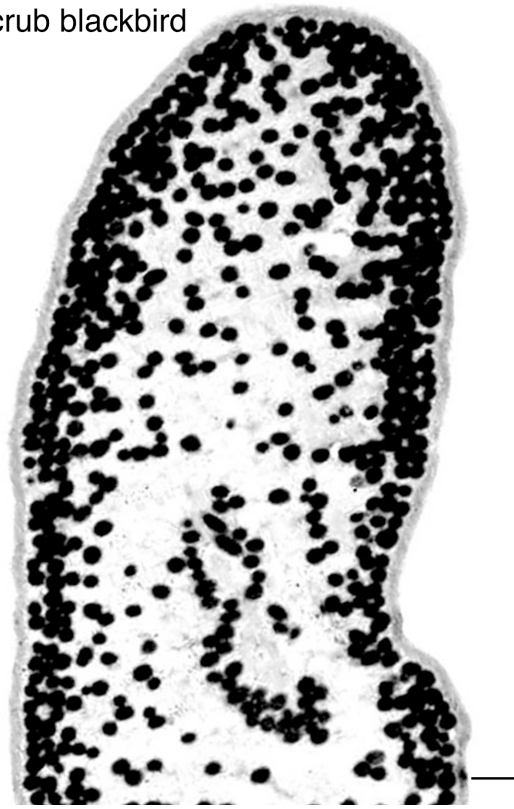

Shiny cowbird

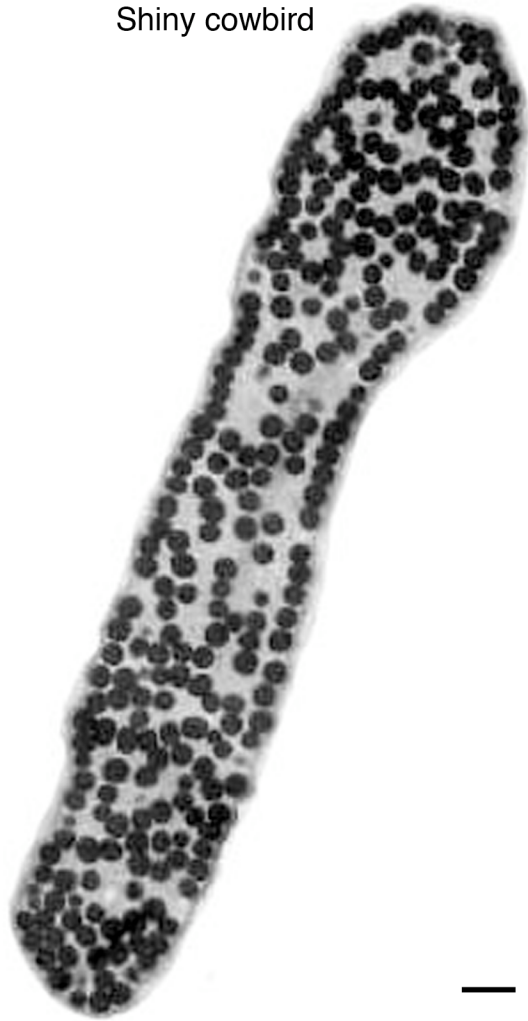

Bobolink

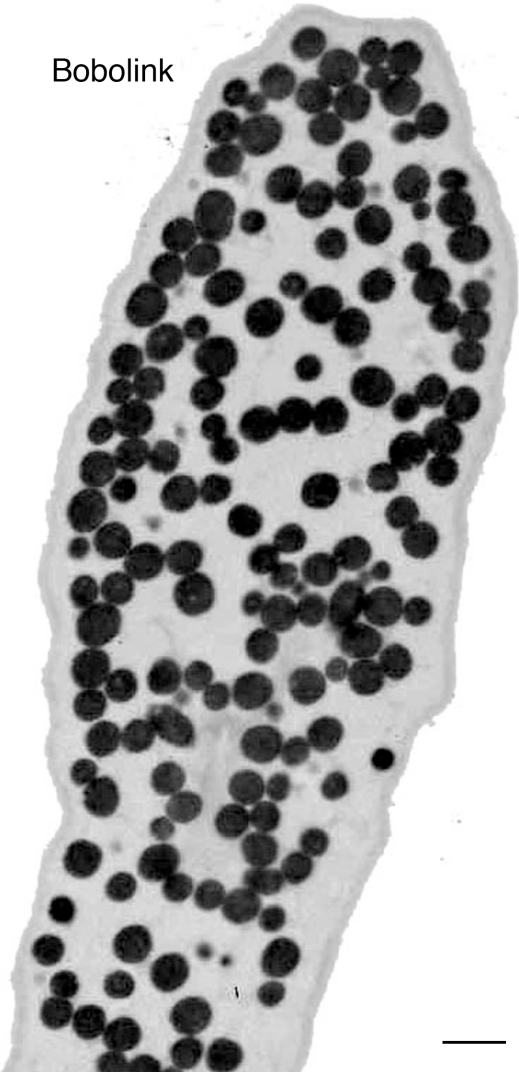

Western  
meadowlark

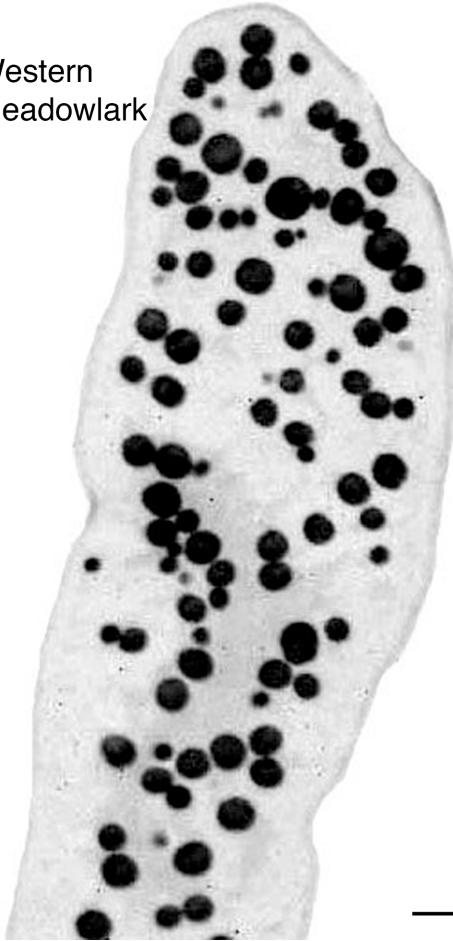

Boat-tailed  
grackle

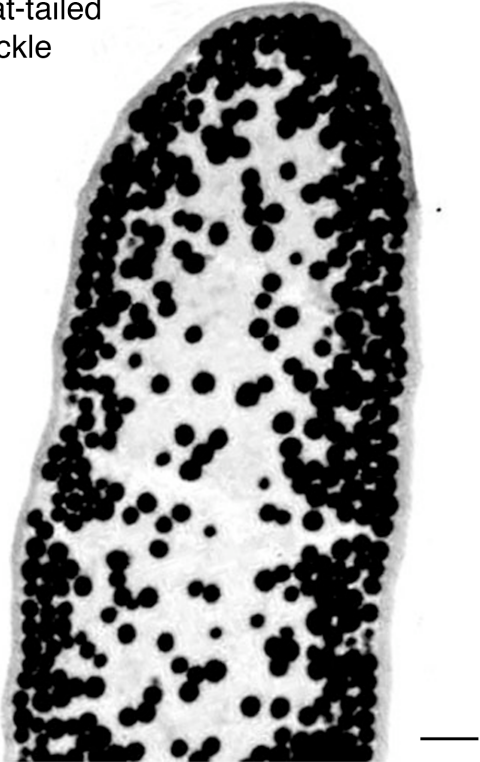

Supplement: rsif20060131s01.pdf [file rsif20060131s01.pdf]
